# Supplementary material for: ‘Buying Salad Is a Lot More Expensive than Going to McDonalds’: Young Adults’ Views about What Influences Their Food Choices
Source: MDPI journal article supplement (doi:10.3390/nu10080996), 2018-07-30
Supplement: s1 [file s1]

**Table S1.** Narrative code descriptions.

| <b>Supplementary File,<br/>Table S1: Narrative code<br/>descriptions. Narrative<br/>code</b> | <b>Description of narrative code</b>                                                                                                                                                                               | <b>Link to main<br/>narrative</b> |
|----------------------------------------------------------------------------------------------|--------------------------------------------------------------------------------------------------------------------------------------------------------------------------------------------------------------------|-----------------------------------|
| <b>Price and cost</b>                                                                        | Food choices are influenced by pricing of food ie. Prioritising foods that cost less. Also food choices that represent value for money (ie. Filling / address hunger given the cost).                              | Value of food                     |
| <b>Placement</b>                                                                             | Food choices are influenced by the placement and presentation of foods, such as in supermarkets and stores.                                                                                                        | Appeal of food                    |
| <b>Flavour</b>                                                                               | Food choices are influenced by an enjoyment or recognition of taste.                                                                                                                                               | Appeal of food                    |
| <b>Time</b>                                                                                  | Food choices are influenced by time or lack thereof – foods are prioritised if they are quick and convenient (cost less in terms of time).                                                                         | Value of food                     |
| <b>Availability</b>                                                                          | Food choices are influenced by what is most accessible and available to buy.                                                                                                                                       | Appeal of food                    |
| <b>Novelty</b>                                                                               | Food choices are influenced by the novelty or newness of products.                                                                                                                                                 | Appeal of food                    |
| <b>Emotions</b>                                                                              | Food choices are influenced by a specific emotional connection, such as: wanting to 'feel good' or cheer up (comfort); memory/nostalgia of childhood and other places; family / community / love; guilt and shame. | Emotional connections with food   |
| <b>Culture</b>                                                                               | Food choices are influenced by a specific cultural group or cultural practices eg. Valuing ethnic groups and their specific cuisines.                                                                              | Emotional connections with food   |
| <b>Life stage</b>                                                                            | Food choices are influenced by a specific life stage or period of life eg. Being a kid; going to university; moving out of home; working full time OR not working at all.                                          | Value of food                     |
| <b>Purpose</b>                                                                               | Food choices are influenced by association of that food or drink with a particular purpose or action.                                                                                                              | Appeal of food                    |
| <b>Habit</b>                                                                                 | Food choices are influenced by well-established patterns or habits.                                                                                                                                                | Appeal of food                    |
| <b>Reliability</b>                                                                           | Food choices are influenced by the knowledge of their reliability - choosing certain foods because you know what they taste like.                                                                                  | Appeal of food                    |
| <b>Versatility</b>                                                                           | Food choices are influenced by whether or not they are versatile and not boring.                                                                                                                                   | Value of food                     |
| <b>Brands</b>                                                                                | Mentioning of specific food, supermarket or other brands.                                                                                                                                                          | Appeal of food                    |
| <b>Ethical and moral considerations</b>                                                      | Food choices are influenced by ethical and moral considerations including: animal rights/vegetarianism; sustainability and climate change; mass food production etc.                                               | Emotional connections with food   |

|                                    |                                                                                                                                                                       |                                 |
|------------------------------------|-----------------------------------------------------------------------------------------------------------------------------------------------------------------------|---------------------------------|
| <b>Food trends</b>                 | Food choices are influenced by broader food trends such as gluten free; low sugar/low carb; organic foods.                                                            | Other                           |
| <b>Specific health needs</b>       | Food choices are influenced by specific health reasons or diets, including 'medical' diets.                                                                           | Other                           |
| <b>Advertising &amp; marketing</b> | Food choices are influenced by advertising, marketing or promotions, including by celebrities on social media.                                                        | Appeal of food                  |
| <b>Social norms</b>                | Food choices are influenced by social and behavioural norms including the influence of peers.                                                                         | Emotional connections with food |
| <b>Performing adulthood</b>        | Food choices are influenced by the notion of being a 'good' adult and making 'good' choices around food. Includes critical reflection of decision-making and choices. | Performing adulthood            |
